# Supplementary material for: Metabolic Fingerprints of Effective Fluoxetine Treatment in the Prefrontal Cortex of Chronically Socially Isolated Rats: Marker Candidates and Predictive Metabolites
Source: Int J Mol Sci. 2023 Jun 30;24(13):10957. doi: 10.3390/ijms241310957 (PMC10341512; doi:10.3390/ijms241310957)
Supplement: Supplementary file 1 [file ijms-24-10957-s001.zip]

Archive with 5 entries (5 files):
- Supplementary Figure S1.pdf
- Supplementary Figure S2.pdf
- Supplementary Figure S3.pdf
- Supplementary Material S1.pdf
- Supplemetary Table S1.xlsx
