# Supplementary material for: Metabolic Fingerprints of Effective Fluoxetine Treatment in the Prefrontal Cortex of Chronically Socially Isolated Rats: Marker Candidates and Predictive Metabolites
Source: Int J Mol Sci. 2023 Jun 30;24(13):10957. doi: 10.3390/ijms241310957 (PMC10341512; doi:10.3390/ijms241310957)
Supplement: Supplementary file 1 [file ijms-24-10957-s001.zip › Supplemetary Table S1.xlsx]

## Sheet: Supplemetary Table S1
Name	Formula	Molecular Weight	RT [min]	Sample_Control_1	Sample_Control_2	Sample_Control_3	Sample_Control_4	Sample_Control_5	Sample_Control_6	Sample_Control+Flx_1	Sample_Control+Flx_2	Sample_Control+Flx_3	Sample_Control+Flx_4	Sample_Control+Flx_5	Sample_Control+Flx_6	Sample_CSIS_1	Sample_CSIS_2	Sample_CSIS_3	Sample_CSIS_4	Sample_CSIS_5	Sample_CSIS_6	Sample_CSIS_7	Sample_CSIS+Flx_1	Sample_CSIS+Flx_2	Sample_CSIS+Flx_3	Sample_CSIS+Flx_4	Sample_CSIS+Flx_5	Sample_CSIS+Flx_6	Sample__CSIS+Flx_7	Sample_CSIS+Flx_8
Glycolate	C2 H4 O3	76.0162	2.19	4.00527e+06	2.95164e+06	4.92264e+06	5.14945e+06	3.59414e+06	3.30873e+06	4.04277e+06	4.97035e+06	4.0695e+06	3.57043e+06	4.83884e+06	4.54627e+06	7.24236e+06	3.33943e+06	3.06801e+06	3.85287e+06	2.74319e+06	4.49232e+06	2.96091e+06	3.1561e+06	2.99746e+06	3.26375e+06	3.83594e+06	3.69742e+06	2.95799e+06	3.69745e+06	2.70937e+06
Alanine	C3 H7 N O2	89.0475	11.347	1.12194e+08	9.34671e+07	1.37157e+08	1.67284e+08	1.03373e+08	1.08623e+08	1.04013e+08	1.23764e+08	1.10275e+08	9.84582e+07	1.54769e+08	1.36475e+08	1.34296e+08	101876263	1.06428e+08	1.21125e+08	107617366	1.34921e+08	1.1276e+08	1.06498e+08	9.72854e+07	9.83748e+07	1.23659e+08	1.2012e+08	1.12656e+08	1.31105e+08	1.02426e+08
GABA	C4 H9 N O2	103.063	10.499	9.14087e+08	732975026	8.53125e+08	9.28878e+08	7.00915e+08	8.28937e+08	7.42505e+08	9.42287e+08	6.4706e+08	7.46728e+08	8.48911e+08	8.38678e+08	1171929566	8.33785e+08	8.29462e+08	7.74488e+08	6.77837e+08	746735852	5.93803e+08	6.56649e+08	7.03387e+08	6.69903e+08	7.75287e+08	7.68091e+08	6.66929e+08	6.55971e+08	6.04187e+08
Choline	C5 H13 N O	103.099	8.611	2524420672	1810285133	1876504446	3096740422	2079138915	1744169354	1790170804	2543004135	1763188752	1804198212	1882904183	2615488511	3878890509	2037535272	1944437535	1822642354	1965990959	2642456643	2208446268	1915569695	2002912791	1728874290	1956280592	2078699328	1885881648	1502206267	2088147041
Serine	C3 H7 N O3	105.042	12.258	1.16318e+07	9.80287e+06	1.27182e+07	1.47654e+07	1.12926e+07	1.14711e+07	8.55261e+06	1.05506e+07	1.14248e+07	1.10703e+07	1.14216e+07	1.27097e+07	1.61046e+07	1.01378e+07	1.23244e+07	1.44933e+07	1.48272e+07	1.71444e+07	1.07841e+07	1.05673e+07	9.59467e+06	9.57161e+06	9.39833e+06	1.0351e+07	1.19289e+07	1.3523e+07	1.06402e+07
Hypotaurine	C2 H7 N O2 S	109.02	11.648	1.02665e+06	657530	1.01994e+06	1.50371e+06	832779	502663	863781	3252083	1.32804e+06	712725	1.52373e+06	1.83054e+06	1.15041e+06	549941	1.01471e+06	666818	617898	1.0199e+06	490228	1.53851e+06	1.32578e+06	1.15309e+06	1.20281e+06	1.41128e+06	1.19713e+06	1.20933e+06	1.13669e+06
Cytosine	C4 H5 N3 O	111.043	8.822	1.3212e+07	1.06466e+07	1.25475e+07	1.49553e+07	8.68124e+06	8.64378e+06	1.19665e+07	1.93163e+07	1.99268e+07	1.11125e+07	1.55588e+07	1.8451e+07	1.12955e+07	1.06804e+07	1.42716e+07	9.92171e+06	1.10905e+07	1.25437e+07	1.05215e+07	1.61867e+07	1.41305e+07	1.18494e+07	2.16502e+07	1.66912e+07	1.86097e+07	1.24736e+07	1.60058e+07
Histamine	C5 H9 N3	111.079	19.884	2.75834e+06	2.66258e+06	3.2423e+06	4.41068e+06	1.82576e+06	2.39106e+06	1.82279e+06	2.56232e+06	1.95088e+06	1.37474e+06	3.11294e+06	3.59712e+06	4.18132e+06	2.26852e+06	3.73549e+06	4.09003e+06	1.93728e+06	2.84535e+06	1.63012e+06	1.34818e+06	1.1182e+06	1.34353e+06	1.40741e+06	1.9339e+06	2.36805e+06	1.5944e+06	2.32894e+06
Uracil	C4 H4 N2 O2	112.027	1.994	1.68125e+06	2.05893e+06	3.12929e+06	5.78081e+06	1.94347e+06	2.57819e+06	2.6284e+06	4.98835e+06	3.04637e+06	3.30806e+06	4.16005e+06	4.05827e+06	7.02258e+06	3.25847e+06	3.04685e+06	2.41774e+06	2.95803e+06	3.6277e+06	2.1233e+06	3.39461e+06	3.7353e+06	3.0806e+06	3.81774e+06	3.72565e+06	4.76313e+06	4.81626e+06	3.26707e+06
Proline	C5 H9 N O2	115.063	10.284	6.34738e+07	5.43483e+07	8.21959e+07	1.06961e+08	5.36817e+07	5.36255e+07	4.85267e+07	7.892e+07	5.02319e+07	5.0299e+07	6.58712e+07	9.34843e+07	1.5041e+08	6.13429e+07	5.19352e+07	5.81229e+07	4.58719e+07	5.34394e+07	4.15598e+07	5.36205e+07	6.16198e+07	5.79989e+07	5.9317e+07	7.68446e+07	6.05045e+07	5.71096e+07	5.31372e+07
Fumarate	C4 H4 O4	116.012	2.542	2.15902e+07	1.89715e+07	3.06447e+07	3.83951e+07	1.24598e+07	1.51988e+07	2.53592e+07	2.73353e+07	2.07375e+07	1.30643e+07	2.06436e+07	1.25332e+07	6.33939e+07	2.12115e+07	1.44722e+07	1.6262e+07	1.89265e+07	1.49661e+07	9.77863e+06	2.12921e+07	2.24681e+07	1.92767e+07	2.19882e+07	2.06699e+07	2.06512e+07	1.32545e+07	1.78704e+07
Guanidinoacetate	C3 H7 N3 O2	117.054	11.746	1.87062e+06	1.32221e+06	1.32493e+06	1.54189e+06	1.35986e+06	1.75236e+06	1.41202e+06	1.42534e+06	1.75491e+06	1.43719e+06	1.57776e+06	1.3712e+06	1.45207e+06	1.47799e+06	1.69517e+06	1.50702e+06	1.40159e+06	1.08413e+06	789749	1.29856e+06	1.17403e+06	893502	1.01861e+06	1.25912e+06	1.15293e+06	1.54448e+06	1.24165e+06
Valine	C5 H11 N O2	117.079	9.732	5.06968e+07	4.53807e+07	5.79075e+07	7.10144e+07	4.86156e+07	5.3958e+07	3.58765e+07	4.96514e+07	3.46296e+07	3.89108e+07	4.74633e+07	6.30353e+07	5.37299e+07	4.48139e+07	4.01338e+07	4.77585e+07	4.49297e+07	4.90246e+07	4.18836e+07	3.98846e+07	3.64743e+07	3.71391e+07	5.18571e+07	5.42739e+07	5.14264e+07	5.67377e+07	5.00587e+07
Betaine	C5 H11 N O2	117.079	10.143	3.49764e+08	2.56271e+08	3.29003e+08	4.66124e+08	2.77265e+08	2.42217e+08	2.22317e+08	4.22691e+08	2.61029e+08	2.37971e+08	2.77521e+08	427207972	5.02468e+08	3.12708e+08	2.5162e+08	2.67531e+08	2.4193e+08	2.95133e+08	2.70769e+08	2.34226e+08	2.84169e+08	2.45445e+08	3.58476e+08	3.2421e+08	301096700	2.57714e+08	321709642
Succinate	C4 H6 O4	118.028	2.028	7.35908e+07	8.05164e+07	1.07988e+08	1.32536e+08	6.04232e+07	8.01011e+07	1.16986e+08	1.87267e+08	1.2092e+08	1.18442e+08	1.57812e+08	1.51339e+08	1.20244e+08	1.00832e+08	1.00431e+08	1.20103e+08	6.11422e+07	1.65219e+08	1.19397e+08	1.37103e+08	1.37572e+08	1.36963e+08	1.49704e+08	1.44397e+08	7.60122e+07	1.28897e+08	7.72669e+07
Threonine	C4 H9 N O3	119.058	11.347	1.30818e+07	1.19656e+07	1.43148e+07	1.58708e+07	1.00398e+07	1.06409e+07	1.38489e+07	1.47071e+07	1.88907e+07	1.21617e+07	1.61963e+07	1.46221e+07	1.67023e+07	1.15107e+07	1.52969e+07	1.50539e+07	1.11946e+07	2.37598e+07	1.46744e+07	1.40747e+07	1.17648e+07	1.15327e+07	1.32979e+07	1.53263e+07	1.74768e+07	1.55795e+07	1.52898e+07
Taurine	C2 H7 N O3 S	125.014	11.219	1.80893e+08	1.60222e+08	1.9749e+08	2.28894e+08	1.54927e+08	1.82199e+08	1.78219e+08	1.80488e+08	1.61516e+08	1.55858e+08	1.98913e+08	2.02047e+08	2.69343e+08	185468081	1.72629e+08	219360592	1.57883e+08	1.78903e+08	1.3121e+08	1.70647e+08	1.65692e+08	1.44296e+08	1.567e+08	1.99897e+08	176766146	1.8893e+08	1.69254e+08
5-Methylcytosine	C5 H7 N3 O	125.059	10.214	1.20633e+06	1.32008e+06	1.76145e+06	1.49516e+06	785720	1.32148e+06	861570	1.11308e+06	918992	1.06447e+06	1.16091e+06	1.10428e+06	1.94691e+06	1.30203e+06	1.18937e+06	1.39445e+06	1.08639e+06	1.44274e+06	1.3112e+06	1.34253e+06	935036	1.04304e+06	984357	943550	1.13457e+06	1.07999e+06	964862
Thymine	C5 H6 N2 O2	126.043	1.965	72588.4	119719	121754	215937	81310.9	292669	174379	350486	187959	254437	217972	193980	452795	173441	203713	122275	146438	170607	139973	161451	148598	194161	200427	212602	185689	239782	139057
Hydroxyproline	C5 H9 N O3	131.058	11.249	641353	648383	1.17635e+06	940176	564351	909914	970201	671399	728444	655073	896907	1.15696e+06	1.65327e+06	781116	755987	976189	723803	752968	605708	768279	821565	842667	943427	1.27426e+06	1.03583e+06	816557	841390
Creatine	C4 H9 N3 O2	131.069	11.445	1581615168	1567494360	1771363304	2201839239	1437708215	1660860909	1408602991	1937983221	1565542861	1585121300	1924397786	1905896385	1609572487	1374282382	1552552076	1664986904	1589313638	1799148770	1527360913	1318627906	1337053374	1583894672	1750171684	1860649974	1718829222	1864628099	1778694998
D-Asparagine	C4 H8 N2 O3	132.053	12.241	982071	876050	1.14257e+06	1.07277e+06	817133	1.04754e+06	1.0006e+06	1.42867e+06	1.06677e+06	1.34238e+06	1.48529e+06	1.57013e+06	1.1886e+06	1.09431e+06	854680	1.23801e+06	1.17277e+06	1.31225e+06	1.20582e+06	1.28425e+06	1.10226e+06	1.04723e+06	1.0576e+06	1.32567e+06	1.44195e+06	1.85186e+06	1.39623e+06
Aspartate	C4 H7 N O4	133.037	12.347	3.56002e+07	2.58624e+07	2.87189e+07	3.40956e+07	2.92334e+07	3.22427e+07	2.72756e+07	2.39141e+07	3.3905e+07	2.28855e+07	3.50239e+07	3.02391e+07	3.18457e+07	2.78609e+07	2.53523e+07	3.55797e+07	3.66845e+07	2.6814e+07	2.38203e+07	3.10225e+07	2.7217e+07	3.20628e+07	2.75767e+07	3.02744e+07	2.69978e+07	3.35161e+07	2.14155e+07
Adenine	C5 H5 N5	135.054	4.99	3.28874e+08	3.49532e+08	3.75587e+08	5.3544e+08	3.09501e+08	2.99569e+08	238819026	2.87718e+08	2.33652e+08	287919753	3.18166e+08	2.76819e+08	5.5679e+08	3.31646e+08	2.55485e+08	4.70676e+08	2.69176e+08	4.40168e+08	3.79785e+08	2.51142e+08	3.13991e+08	2.3896e+08	3.1435e+08	3.0587e+08	1.84733e+08	261973027	1.69865e+08
Hypoxanthine	C5 H4 N4 O	136.038	4.829	1865102917	1482656718	1975623284	2111742909	1560922496	1466355032	1737285179	1693046262	1585982375	1432764551	1725616795	1687370427	1308666094	1267372929	1474408442	9.8694e+08	1450931329	1510108675	1512498506	1515148154	1153075157	1189992816	1643503492	1718419949	1611381257	1278428233	1647119825
Methylnicotinamide	C7 H8 N2 O	136.063	9.498	2.5107e+07	2.39838e+07	2.06053e+07	20570366	2.27819e+07	1.7983e+07	1.16715e+07	1.27621e+07	1.87052e+07	1.6686e+07	1.24109e+07	1.31158e+07	1.27958e+07	1.92154e+07	1.9495e+07	1.52331e+07	1.57263e+07	1.57407e+07	1.61157e+07	1.79294e+07	2.31128e+07	1.67064e+07	2.8042e+07	1.95599e+07	1.7234e+07	1.30117e+07	1.91058e+07
Urocanic acid	C6 H6 N2 O2	138.045	4.838	1.31403e+06	596294	1.95854e+06	2.16378e+06	1.5114e+06	1.44262e+06	1.88042e+06	1.62739e+06	1.59941e+06	1.47592e+06	1.87038e+06	1.63849e+06	1.40045e+06	1.59311e+06	298393	901987	1.51753e+06	1.55516e+06	1.5039e+06	1.61118e+06	1.25914e+06	465046	1.72602e+06	1.73105e+06	1.56465e+06	1.56861e+06	1.37212e+06
Phosphoethanolamine	C2 H8 N O4 P	141.02	16.193	2.77461e+06	1.52982e+06	1.37203e+06	1.7368e+06	2.82313e+06	862601	2.12877e+06	2.17773e+06	2.24133e+06	1.544e+06	1.66223e+06	1.03186e+06	1.0559e+06	1.52284e+06	1.23838e+06	2.28965e+06	1.75767e+06	702691	188716	970702	1.27372e+06	1.68313e+06	1.84418e+06	1.74335e+06	1.39699e+06	2.38958e+06	1.30038e+06
Stachydrine	C7 H13 N O2	143.094	10.09	8.45868e+06	7.63226e+06	1.06994e+07	1.25685e+07	6.29063e+06	5.24513e+06	2.42355e+07	6.34731e+07	3.08184e+07	2.83241e+07	4.27949e+07	6.89759e+07	3.36166e+07	1.52669e+07	9.34156e+06	1.1635e+07	6.54089e+06	2.85526e+07	2.73415e+07	1.94651e+07	3.39514e+07	1.97961e+07	4.57983e+07	5.26682e+07	4.78224e+07	2.82227e+07	5.84086e+07
4-Guanidinobutanoate	C5 H11 N3 O2	145.086	9.552	371604	318309	371503	529785	312203	252875	199097	272505	237283	181542	298090	284358	586486	288541	225883	283461	257167	198108	190488	276974	299594	251841	300702	234416	190559	217858	215499
Deoxycarnitine	C7 H15 N O2	145.11	8.865	1.45603e+08	1.16577e+08	1.43451e+08	1.61276e+08	1.14794e+08	1.16063e+08	1.05123e+08	1.11355e+08	8.49989e+07	9.03933e+07	1.30615e+08	1.24721e+08	1.32459e+08	1.26087e+08	8.35605e+07	102714085	7.47625e+07	1.16979e+08	8.80938e+07	1.00591e+08	1.33479e+08	8.55776e+07	126894921	9.48785e+07	92435328	1.05008e+08	8.18111e+07
Acetylcholine	C7H15NO2	145.11	5.705	3.17451e+07	1.31511e+07	2.11653e+07	3.72553e+07	2.87634e+07	1.24482e+07	1.10151e+07	1.50257e+07	1.09436e+07	7.56517e+06	1.57776e+07	1.708e+07	3.59108e+07	2.90268e+07	3.10308e+07	4.26399e+07	2.11516e+07	1.12611e+07	5.4729e+06	1.49841e+07	1.4438e+07	1.44138e+07	1.46664e+07	1.58223e+07	1.09899e+07	1.2455e+07	9.63429e+06
Glutamine	C5 H10 N2 O3	146.069	12.047	1.79647e+08	1.29198e+08	145597802	213126799	1.39994e+08	1.29772e+08	1.20076e+08	2.57193e+08	1.19895e+08	1.37985e+08	1.72134e+08	1.59972e+08	2.59755e+08	1.55455e+08	1.58624e+08	157277729	1.55809e+08	1.6417e+08	1.16076e+08	1.18517e+08	9.91407e+07	1.17643e+08	1.23475e+08	1.36903e+08	1.29252e+08	1.60861e+08	1.17188e+08
Lysine	C6 H14 N2 O2	146.105	17.008	2.54117e+06	3.44905e+06	2.68504e+06	3.86194e+06	2.27499e+06	1.83175e+06	3.87986e+06	2.79521e+06	2.21281e+06	2.45708e+06	2.07016e+06	2.34728e+06	4.52765e+06	1.97418e+06	2.81945e+06	2.16425e+06	1.9794e+06	2.56552e+06	2.8721e+06	3.70395e+06	2.88682e+06	2.24624e+06	2.61374e+06	3.19746e+06	1.53824e+06	1.51623e+06	2.24036e+06
Glutamate	C5 H9 N O4	147.053	11.743	3.73194e+08	2.72453e+08	2.95702e+08	393962451	2.8209e+08	3.32199e+08	3.1066e+08	3.86566e+08	3.21974e+08	2.72505e+08	3.26966e+08	2.78614e+08	2.31771e+08	3.50114e+08	2.97448e+08	3.64985e+08	2.62829e+08	2.54558e+08	1.91903e+08	2.90187e+08	3.02555e+08	2.65601e+08	2.99216e+08	280653912	2.7714e+08	3.73074e+08	2.64375e+08
Hydroxyglutaric acid	C5 H8 O5	148.038	4.165	1.74082e+07	9.17944e+06	1.79869e+07	2.75716e+07	1.2101e+07	1.10736e+07	3.2566e+07	4.22489e+07	3.37457e+07	2.65351e+07	4.50032e+07	3.70731e+07	3.08093e+07	1.64872e+07	1.95641e+07	1.5983e+07	1.42833e+07	2.04084e+07	2.21021e+07	3.15347e+07	2.66441e+07	3.64303e+07	3.25323e+07	2.56735e+07	2.05464e+07	2.61294e+07	1.75413e+07
Xanthine	C5 H4 N4 O2	152.033	5.567	4.21996e+07	5.20876e+07	5.81614e+07	5.51907e+07	2.98533e+07	5.0916e+07	2.97764e+07	3.3338e+07	2.5427e+07	2.47216e+07	3.4014e+07	2.893e+07	6.94072e+07	3.51602e+07	3.32729e+07	3.89371e+07	3.23502e+07	2.81493e+07	2.10202e+07	2.73173e+07	2.46294e+07	2.66802e+07	2.5489e+07	3.19019e+07	3.32007e+07	2.4613e+07	3.33866e+07
Histidine	C6 H9 N3 O2	155.069	16.231	1.90228e+07	1.35089e+07	1.96887e+07	2.28447e+07	1.17114e+07	1.14219e+07	1.58371e+07	2.99382e+07	1.26963e+07	1.40594e+07	1.81811e+07	1.76556e+07	2.65668e+07	1.30603e+07	1.48961e+07	1.61413e+07	1.27488e+07	1.55871e+07	1.00351e+07	1.46179e+07	1.23772e+07	1.28082e+07	1.37684e+07	1.69741e+07	1.34757e+07	1.63341e+07	1.23714e+07
Orotic acid	C5 H4 N2 O4	156.018	8.415	123275	122887	173357	136596	96043.1	95386.3	97146.1	132210	98775.9	103781	112696	118578	172377	106757	117686	141646	107449	96101.3	66907.6	97484	93118.1	86644.1	85330	94666.6	110456	118379	85884.5
Allantoin	C4 H6 N4 O3	158.045	8.718	923038	793931	1.05941e+06	767569	802821	770499	787403	995803	1.05106e+06	701627	964640	1.01463e+06	579961	785565	878960	1.01131e+06	709355	899907	837533	763019	932279	688678	1.0174e+06	1.23255e+06	1.11352e+06	937559	1.11119e+06
Carnitine	C7 H15 N O3	161.105	10.68	1142226917	9.8599e+08	1262021446	1788836397	9.84456e+08	1072663940	8.44906e+08	1143477830	894718726	9.21839e+08	1336977408	1461419199	1444452110	9.96016e+08	9.02686e+08	1244595876	8.19224e+08	1181045719	1102821210	8.6393e+08	9.84058e+08	7.51876e+08	1203207901	1043018128	9.83854e+08	8.00127e+08	1169789022
3-Hydroxy-3-methylglutarate	C6 H10 O5	162.054	2.332	4.60352e+07	3.72746e+07	5.35599e+07	6.38161e+07	3.77418e+07	4.01497e+07	3.12288e+07	4.34102e+07	3.91353e+07	2.53536e+07	3.7757e+07	4.13102e+07	6.03745e+07	3.71862e+07	4.04977e+07	4.35534e+07	2.98963e+07	3.90235e+07	2.19098e+07	2.91478e+07	2.83071e+07	2.77014e+07	3.55566e+07	2.86478e+07	2.85484e+07	3.10406e+07	2.49776e+07
Methioninesulfoxide	C5 H11 N O3 S	165.046	12.134	2.74085e+06	1.95876e+06	2.58491e+06	2.80568e+06	1.93982e+06	2.20242e+06	1.47298e+06	2.39745e+06	1.49935e+06	1.47063e+06	2.12202e+06	2.27905e+06	2.73373e+06	2.27926e+06	1.69734e+06	2.0459e+06	1.96402e+06	1.90793e+06	1.19157e+06	1.5016e+06	1.20673e+06	1.43896e+06	1.70023e+06	1.80383e+06	1.72708e+06	1.81143e+06	1.42622e+06
7-Methylguanine	C6 H7 N5 O	165.065	6.641	747505	667259	1.07565e+06	1.68322e+06	600561	1.00777e+06	1.03492e+06	1.65728e+06	1.17739e+06	930548	1.55848e+06	1.97312e+06	1.65233e+06	862488	1.03524e+06	1.20528e+06	959778	1.10102e+06	1.01382e+06	942621	1.23704e+06	865743	1.60492e+06	1.52924e+06	1.40593e+06	1.12905e+06	1.41538e+06
Phenylalanine	C9 H11 N O2	165.079	8.475	17171968	1.08197e+07	1.75251e+07	1.90842e+07	1.20121e+07	9.48347e+06	7.71901e+06	2.15005e+07	1.07753e+07	8.36329e+06	1.21159e+07	1.47046e+07	2.36142e+07	1.13341e+07	1.00087e+07	1.17143e+07	9.70485e+06	1.07295e+07	9.45054e+06	1.0263e+07	1.02679e+07	1.13013e+07	1.24782e+07	1.32482e+07	1.17862e+07	1.0197e+07	1.06712e+07
Phosphoenolpyruvic acid	C3 H5 O6 P	167.983	13.279	21745.5	9705.77	5898.05	9430.08	30682	5837.82	22417	19983.1	7129.47	5169.34	4927.68	8545	13900.8	6555.98	8942.49	10304	11422.3	12048	7210.69	6978.06	8662.9	6345.8	16766.9	17071.3	7900.64	25432.8	8290.57
Pyridoxamine	C8 H12 N2 O2	168.09	13.392	18831033	2.43193e+07	2.82248e+07	3.97878e+07	1.32031e+07	2.53854e+07	1.80594e+07	2.70481e+07	2.05569e+07	2.19038e+07	3.14617e+07	3.99014e+07	6.19953e+07	2.94536e+07	1.99047e+07	2.21837e+07	1.75903e+07	4.32091e+07	4.37942e+07	3.47294e+07	2.49412e+07	1.8238e+07	2.10911e+07	2.5179e+07	2.38288e+07	1.93062e+07	1.98862e+07
1-Methylhistidine	C7 H11 N3 O2	169.085	15.987	1.19904e+06	826245	1.37873e+06	1.9541e+06	893355	821524	584583	1.68593e+06	715552	665716	1.36851e+06	1.40377e+06	1.45199e+06	878933	973290	837557	819359	957140	982989	642662	788973	808287	832354	1.16386e+06	922887	929719	1.04646e+06
3-Methylhistidine	C7 H11 N3 O2	169.085	16.687	5.77134e+06	5.44446e+06	8.35412e+06	8.73764e+06	4.39833e+06	4.86813e+06	3.92205e+06	5.32558e+06	3.75622e+06	3.73882e+06	6.9618e+06	6.32339e+06	9.34571e+06	5.40734e+06	4.89036e+06	4.15715e+06	5.19912e+06	4.59608e+06	4.08059e+06	4.76541e+06	4.51605e+06	5.29702e+06	4.4463e+06	5.09825e+06	5.06113e+06	5.23585e+06	4.59177e+06
Dihydroxyacetone phosphate	C3 H7 O6 P	169.999	13.309	214015	109269	74875.2	125926	108295	84582.8	354283	364747	295032	108809	114643	76606	168274	176839	201577	195718	178995	99088.7	75767.9	262948	234151	231354	200953	200851	153789	126981	141278
Glycerolphosphate	C3 H9 O6 P	172.014	13.621	457423	263139	246362	342278	433527	256902	298907	374149	267265	213232	296770	241830	317489	346999	289180	394864	319250	265013	205208	221274	217992	293949	297047	344787	252439	300331	221844
Aconitate	C6 H6 O6	174.017	5.641	4.6797e+06	3.29661e+06	4.02155e+06	3.85281e+06	3.76578e+06	3.30219e+06	2.98612e+06	3.84379e+06	2.08935e+06	1.05799e+06	3.01011e+06	1.70831e+06	3.88859e+06	4.07223e+06	3.03697e+06	3.01122e+06	3.73051e+06	2.83842e+06	2.31763e+06	2.10257e+06	1.68145e+06	2.21743e+06	2.47483e+06	1.90512e+06	2.73263e+06	2.76013e+06	2.70953e+06
Arginine	C6 H14 N4 O2	174.111	16.597	5.00966e+06	7.1425e+06	5.21113e+06	6.81277e+06	4.30622e+06	4.30513e+06	4.53755e+06	4.08869e+06	3.95282e+06	5.59801e+06	5.04592e+06	5.81439e+06	6.25283e+06	3.82316e+06	4.31611e+06	4.31772e+06	4.46283e+06	5.17321e+06	5.84443e+06	5.63587e+06	3.80314e+06	3.718e+06	4.28414e+06	5.21454e+06	4.37055e+06	4.56926e+06	5.25823e+06
N-Acetylaspartic acid	C6 H9 N O5	175.049	4.788	2104190448	1855533322	2051494854	2424752190	1862143741	1940946137	1793511655	2165280829	2029880766	1644032938	2130505847	2039239113	2245562451	1941128349	1825881873	2026517416	1692381947	1917792401	1542844590	1941303053	1725391774	1979279511	2003341544	2028061587	1836796211	2248314575	1695537335
Citrulline	C6 H13 N3 O3	175.096	12.782	3.80384e+06	3.48281e+06	3.79655e+06	3.95333e+06	2.66583e+06	3.06318e+06	2.74548e+06	7.39784e+06	2.73945e+06	2.15494e+06	2.83639e+06	3.25358e+06	6.60453e+06	3.4778e+06	3.61931e+06	4.58667e+06	3.47785e+06	3.53955e+06	1.45733e+06	3.86974e+06	3.53958e+06	2.65039e+06	3.92703e+06	4.71585e+06	2.86141e+06	2.59895e+06	2.75444e+06
C6H12O6	C6 H12 O6	180.064	10.13	940461	828652	928483	1.08298e+06	672831	1.06598e+06	542199	859542	696074	696649	1.06513e+06	941034	1.08904e+06	935183	738934	1.09286e+06	730879	976687	630282	761801	462284	622638	616667	664758	717086	437076	733717
Myo-Inositol	C6H12O6	180.064	11.979	1.404e+06	1.71559e+06	1.07016e+06	1.63069e+06	1.32827e+06	1.36566e+06	1.77163e+06	1.61553e+06	1.85501e+06	1.3699e+06	1.50596e+06	1.33891e+06	2.13013e+06	1.80247e+06	2.69661e+06	2.37314e+06	2.32745e+06	2.3567e+06	1.87222e+06	2.26707e+06	1.90753e+06	1.45688e+06	1.657e+06	1.59723e+06	1.35731e+06	1.6914e+06	1.54104e+06
Tyrosine	C9 H11 N O3	181.074	10.09	2.73404e+07	2.2971e+07	3.31356e+07	3.90327e+07	2.00384e+07	2.00526e+07	1.48947e+07	3.20254e+07	2.17438e+07	1.8492e+07	2.96972e+07	3.15693e+07	3.35605e+07	2.19311e+07	2.01564e+07	1.9956e+07	2.36238e+07	3.59342e+07	1.7238e+07	2.06878e+07	2.35983e+07	2.14285e+07	2.78315e+07	29757125	2.63257e+07	3.19774e+07	2.41614e+07
3-(4-Hydroxyphenyl)lactate	C9 H10 O4	182.059	2.398	1.28222e+06	970478	1.12627e+06	1.66903e+06	832909	854444	648327	1.68682e+06	988106	754472	1.20497e+06	1.18155e+06	1.72908e+06	866010	835569	873353	733665	1.19639e+06	619129	785387	916038	841741	1.43715e+06	1.06393e+06	1.04956e+06	923469	1.03015e+06
C6 sugar alcohol	C6 H14 O6	182.08	9.137	3.00224e+06	2.30635e+06	2.90834e+06	2.96156e+06	2.54962e+06	2.86492e+06	2.03598e+06	2.65288e+06	3.01236e+06	2.46807e+06	2.82605e+06	3.38585e+06	4.14338e+06	2.58931e+06	2.80359e+06	3.06031e+06	2.15117e+06	3.0976e+06	2.29478e+06	2.32091e+06	2.59657e+06	2.57901e+06	3.01384e+06	2.71443e+06	2.94734e+06	3.20104e+06	2.73574e+06
Phosphocholine	C5 H14 N O4 P	183.066	20.301	1.02142e+08	5.10229e+07	8.99081e+07	1.04549e+08	7.661e+07	4.83002e+07	3.08359e+07	8.26832e+07	5.92955e+07	4.84014e+07	7.69033e+07	6.77475e+07	8.16978e+07	5.39392e+07	4.87768e+07	7.29741e+07	6.18879e+07	2.31939e+07	1.39332e+07	5.18916e+07	5.50003e+07	5.86963e+07	1.0219e+08	7.73486e+07	6.73109e+07	6.89405e+07	6.05061e+07
N1-Acetylspermidine	C9 H21 N3 O	187.168	19.282	819167	968368	1.29835e+06	1.17885e+06	488260	947185	586799	747841	401339	904444	766039	849078	1.77718e+06	1.33186e+06	448276	1.06957e+06	745332	898310	791088	726767	676966	589803	454107	1.02706e+06	678623	641843	475869
N8-Acetylspermidine	C9 H21 N3 O	187.168	19.879	412408	275942	284093	522701	278691	311187	368551	533970	208368	202849	261697	467029	801077	274915	255344	326024	257305	327177	245570	230563	205860	278366	341063	349484	232037	266149	395109
N-alpha-Acetyllysine	C8 H16 N2 O3	188.116	11.539	669385	408716	660838	1.01317e+06	511818	457866	406731	755001	418040	363090	576651	452925	1.24796e+06	546850	553730	495207	459466	576589	516308	456237	427216	436836	403141	672243	386618	444487	362304
Trimethyllysine	C9 H20 N2 O2	188.152	17.37	6.68976e+06	6.08001e+06	9.03262e+06	1.11711e+07	6.58865e+06	7.33499e+06	6.74021e+06	1.26829e+07	5.29716e+06	5.54213e+06	8.11587e+06	1.10579e+07	1.11687e+07	5.75486e+06	6.14519e+06	7.02258e+06	4.70953e+06	5.50438e+06	6.57015e+06	5.81751e+06	6.37956e+06	9.42179e+06	1.17429e+07	1.23598e+07	1.02585e+07	5.86124e+06	9.49041e+06
Kynurenic acid	C10 H7 N O3	189.042	5.972	280488	171999	215555	104032	260136	656681	184377	331630	73268.2	391883	747719	514459	149671	147761	1.17489e+06	309413	411971	245648	269495	26110.9	41935.3	198197	68136.3	234212	135891	72858.1	251712
N-Acetylglutamic acid	C7 H11 N O5	189.064	3.763	3.57268e+07	3.58819e+07	4.79922e+07	55757198	3.35838e+07	3.98942e+07	3.21168e+07	3.99413e+07	3.67241e+07	31620409	4.61057e+07	3.95459e+07	5.49822e+07	3.87873e+07	3.65998e+07	4.10455e+07	3.30678e+07	3.2724e+07	2.49754e+07	3.01693e+07	3.14059e+07	3.21661e+07	3.77785e+07	3.48223e+07	2.74777e+07	3.32991e+07	2.71395e+07
Acetylcarnitine	C9 H17 N O4	203.115	8.757	2.45609e+06	1.75482e+06	5.41809e+06	6.2943e+06	784759	411882	1.3549e+06	757375	802439	1.17768e+06	1.47037e+06	562312	152323	579801	453586	520354	812112	355717	146500	1.22306e+06	1.10557e+06	531357	1.47213e+06	1.97166e+06	1.99496e+06	1.59404e+06	1.52418e+06
Tryptophan	C11 H12 N2 O2	204.09	9.039	1.44586e+07	9.75402e+06	1.31197e+07	1.3872e+07	9.88089e+06	6.57508e+06	8.21635e+06	1.76166e+07	9.3351e+06	7.92675e+06	1.18566e+07	1.1777e+07	1.81412e+07	9657099	8.92508e+06	1.15671e+07	8.22981e+06	1.05396e+07	7.14585e+06	1.26452e+07	1.00233e+07	1.22208e+07	1.16235e+07	1.01318e+07	9.79618e+06	1.20101e+07	9.37295e+06
Indoxylsulfate	C8 H7 N O4 S	213.01	4.623	111489	143050	132085	79117.5	46692	60980.9	163170	323973	173921	158955	277320	374619	79066.7	138434	82056.4	63105.7	109630	112247	117611	65155.6	58055.9	91086	220498	188694	239702	124389	337828
Acetylarginine	C8 H16 N4 O3	216.122	11.281	4.11674e+06	3.78699e+06	5.72761e+06	6.09372e+06	3.69024e+06	4.8707e+06	1.16771e+06	2.04608e+06	920219	784308	1.30947e+06	1.43862e+06	6.98173e+06	3.45227e+06	3.78378e+06	4.66739e+06	4.12371e+06	2.74766e+06	2.22766e+06	1.09367e+06	3.0625e+06	2.50916e+06	4.54593e+06	6.10935e+06	1.29179e+06	2.90146e+06	1.01059e+06
Propionylcarnitine	C10 H19 N O4	217.131	7.947	338712	311687	458071	1.0058e+06	345659	315303	689508	986953	573094	625549	1.70842e+06	2.51233e+06	865366	447574	223750	289856	347419	446131	828354	928842	1.17542e+06	621947	1.11999e+06	1.32884e+06	832934	457377	720428
Pantothenic acid	C9 H17 N O5	219.11	1.781	3.44313e+07	3.52243e+07	4.62467e+07	8.32336e+07	2.80078e+07	4.35097e+07	3.85585e+07	6.76855e+07	4.00799e+07	4.20581e+07	7.13719e+07	7.51551e+07	6.41345e+07	4.16182e+07	3.68388e+07	4.49147e+07	3.26356e+07	4.55413e+07	3.59941e+07	3.45692e+07	3.48034e+07	3.66432e+07	4.04292e+07	5.50084e+07	4.54636e+07	4.50524e+07	4.31735e+07
Cystathionine	C7 H14 N2 O4 S	222.067	15.315	255940	433321	210404	271722	266338	367364	243395	878263	615069	540836	390298	335325	284528	212463	399858	563479	342899	649984	539057	309636	230472	433317	323991	322969	230276	376054	345271
N-Acetyltyrosine	C11 H13 N O4	223.085	2.136	672726	563512	581690	750429	543355	519673	309531	1.01747e+06	454000	351534	678739	614947	939200	490825	461428	530099	437198	852628	545667	455835	415279	514930	615440	551636	487282	680809	453792
Deoxyuridine	C9 H12 N2 O5	228.075	2.664	1.6995e+06	1.65151e+06	1.71329e+06	2.7458e+06	1.37911e+06	1.5123e+06	1.76962e+06	1.76322e+06	1.67102e+06	1.03708e+06	1.46829e+06	1.97903e+06	3.97343e+06	1.79494e+06	1.24351e+06	1.63452e+06	1.0206e+06	1.94244e+06	1.466e+06	1.49632e+06	1.2913e+06	1.56497e+06	1.80671e+06	1.3265e+06	1.40654e+06	2.20464e+06	1.27448e+06
Prolylleucine	C11 H20 N2 O3	228.147	8.039	2.0363e+06	2.34788e+06	2.22117e+06	3.07275e+06	2.1366e+06	1.63292e+06	1.61806e+06	1.8743e+06	1.81332e+06	1.77112e+06	2.14627e+06	2.9587e+06	2.61687e+06	1.89066e+06	1.3739e+06	1.65683e+06	1.27378e+06	1.34295e+06	1.34381e+06	1.18365e+06	1.47622e+06	1.73947e+06	1.73566e+06	2.02162e+06	1.31395e+06	1.12202e+06	1.74632e+06
Ribosephosphate	C5 H11 O8 P	230.019	13.212	4.75141e+06	5.82839e+06	2.87098e+06	4.46217e+06	4.54138e+06	4.23356e+06	5.73276e+06	5.73534e+06	6.89502e+06	4.74214e+06	3.8258e+06	3.02024e+06	1.96705e+06	4205529	5.5337e+06	5.00272e+06	6.05101e+06	5.01316e+06	5.83077e+06	8.61998e+06	5.60713e+06	5.75838e+06	6.71998e+06	5.38757e+06	4.31356e+06	5.51845e+06	5.18344e+06
Butanoylcarnitine	C11H21NO4	231.146	7.536	644595	435978	770727	1.8727e+06	412889	415738	1.39356e+06	2.44869e+06	708447	686529	2.23306e+06	2.55898e+06	1.20696e+06	589195	287746	492016	282222	671376	853567	1.19199e+06	1.12588e+06	1.03378e+06	1.19028e+06	1.58534e+06	868597	704038	1.01687e+06
Cytidine	C9 H13 N3 O5	243.085	9.524	3.37056e+07	2.30589e+07	3.18735e+07	3.64141e+07	2.3756e+07	2.63918e+07	2.27849e+07	3.38756e+07	2.96288e+07	2.5311e+07	3.40558e+07	3.5261e+07	4.00315e+07	2.6913e+07	2.62712e+07	2.97185e+07	2.27762e+07	2.80414e+07	2.63583e+07	2.89337e+07	2.81901e+07	2.19872e+07	3.03586e+07	2.79113e+07	2.81594e+07	2.45665e+07	2.40331e+07
Uridine	C9 H12 N2 O6	244.069	5.52	3.48175e+07	3.32575e+07	3.80541e+07	4.55444e+07	3.21085e+07	3.5197e+07	3.31896e+07	4.48523e+07	3.36945e+07	2.9466e+07	4.21921e+07	4.26664e+07	5.07249e+07	3.25309e+07	3.63819e+07	3.65081e+07	2.53742e+07	4.18608e+07	3.27278e+07	3.67433e+07	3.35971e+07	3.32406e+07	3.71153e+07	3.50336e+07	2.82313e+07	3.94405e+07	3.18441e+07
Pseudouridine	C9 H12 N2 O6	244.07	8.083	610915	540282	554603	788334	595693	695946	590483	634984	598217	556633	742333	808683	760737	624342	601290	673238	625561	317340	473761	512192	513458	508474	654338	654991	646870	688128	591769
Glycerophosphocholine	C8 H20 N O6 P	257.102	13.992	1.41443e+07	1.16403e+07	1.67133e+07	2.38508e+07	1.00078e+07	1.53616e+07	8.54946e+06	2.31661e+07	6.62143e+06	5.83161e+06	6.72524e+06	3.02886e+07	3.12321e+07	1.50645e+07	10438510	1.91827e+07	8.85795e+06	1.28426e+07	9.36442e+06	9.8456e+06	5.81736e+06	9.40912e+06	7.15326e+06	3.04631e+07	9.08247e+06	6.73207e+06	8.36501e+06
Hexanoylcarnitine	C13 H25 N O4	259.178	7.098	362913	180244	180520	258788	270103	255052	115719	215607	105251	95327.1	158707	207668	553182	259269	153201	258645	318090	234098	295668	130464	146667	119728	104099	153398	125286	171453	123191
C6H13O9P	C6 H13 O9 P	260.03	13.924	2.59734e+06	2.7222e+06	1.23599e+06	1.85685e+06	3.03511e+06	1.53554e+06	4.1101e+06	3.21661e+06	4.84044e+06	3.55979e+06	3.0365e+06	2.27038e+06	798663	2.39818e+06	1.90628e+06	3.93443e+06	2.57296e+06	1.34009e+06	695062	3.82888e+06	3.21943e+06	3.97638e+06	3.93628e+06	3.45709e+06	3.01342e+06	2.66806e+06	3.09657e+06
Glutamylleucine	C11 H20 N2 O5	260.137	9.591	1.06527e+06	742584	1.13475e+06	1.0284e+06	750725	741194	751155	1.06901e+06	808337	791702	805337	1.02556e+06	954803	762400	702766	687634	686984	844759	713134	620593	716906	660980	834643	877361	715630	728977	829627
Thiamine	C12 H16 N4 O S	264.104	11.24	5.12895e+07	5.0403e+07	6.59654e+07	9.88026e+07	4.7572e+07	4.71519e+07	3.16396e+07	6.69869e+07	3.35032e+07	3.40851e+07	5.61544e+07	5.29442e+07	9.24067e+07	4.82086e+07	5.00423e+07	5.01061e+07	4.60577e+07	6.95558e+07	6.64629e+07	4.39913e+07	3.48334e+07	3.25954e+07	38297887	4.14794e+07	5.75355e+07	5.49517e+07	4.89745e+07
Adenosine	C10 H13 N5 O4	267.096	4.674	3.13291e+08	3.24183e+08	2.70161e+08	5.2769e+08	3.25481e+08	3.34136e+08	4.30225e+08	7.37409e+08	6.25445e+08	3.40226e+08	5.69821e+08	488699936	8.6888e+08	4.58405e+08	511027867	1025319510	2.49612e+08	6.93731e+08	4.64149e+08	8.62436e+08	5.61403e+08	6.12054e+08	6.74251e+08	4.32551e+08	158744666	7.97708e+08	1.36998e+08
Inosine	C10 H12 N4 O5	268.08	7.621	224841088	1.86683e+08	2.32906e+08	2.85373e+08	1.87464e+08	2.04423e+08	2.01011e+08	2.5204e+08	2.19646e+08	2.10531e+08	244942264	263088725	3.30207e+08	2.19125e+08	2.25235e+08	2.59254e+08	2.0918e+08	227481945	202205259	2.15404e+08	2.09006e+08	1.93568e+08	2.16199e+08	2.10873e+08	1.78644e+08	2.27866e+08	1.88169e+08
Glutamyl-glutamine	C10 H17 N3 O6	275.111	13.047	8.35246e+06	3.92881e+06	4.07033e+06	6.97125e+06	6.57823e+06	3.90519e+06	4.73145e+06	1.04992e+07	4.55937e+06	4.14689e+06	5.09451e+06	5.62775e+06	8.20505e+06	3.82663e+06	7.14324e+06	3.5222e+06	7.14178e+06	9.57889e+06	7.75882e+06	5.19506e+06	3.86038e+06	3.46634e+06	4.8545e+06	4.91669e+06	5.19595e+06	5.72689e+06	4.54653e+06
Glutamyl-glutamic acid	C10 H16 N2 O7	276.095	12.322	6.29815e+06	3.94843e+06	3.04361e+06	5.15849e+06	6.43214e+06	3.82233e+06	6.68701e+06	8.00538e+06	7.54027e+06	4.61402e+06	7.39269e+06	7.41226e+06	6.93746e+06	2.52593e+06	6.20296e+06	3.16671e+06	6.76112e+06	1.01875e+07	1.22457e+07	7.2331e+06	5.29003e+06	4.25112e+06	6.86846e+06	6.11493e+06	6.55217e+06	9.35684e+06	6.95022e+06
Saccharopine	C11 H20 N2 O6	276.132	14.882	370181	210987	296736	456600	318484	351978	347399	344720	286360	238492	379738	413334	490573	290195	450105	337912	369315	538507	258631	318153	307203	400022	354006	369213	267777	465551	284055
Guanosine	C10 H13 N5 O5	283.091	9.085	1.35934e+07	1.3764e+07	1.12248e+07	1.95944e+07	9.04122e+06	1.6986e+07	1.32709e+07	1.87499e+07	1.58977e+07	1.25613e+07	2.07031e+07	2.28678e+07	3.08935e+07	1.67014e+07	1.87308e+07	1.93656e+07	1.23753e+07	3.26539e+07	2.86432e+07	1.69421e+07	1.52661e+07	1.55237e+07	1.82456e+07	1.49925e+07	10742178	1.56697e+07	1.48053e+07
Xanthosine	C10 H12 N4 O6	284.075	7.983	379838	493993	640492	701188	293240	522076	238195	385903	263380	271444	361097	391890	500976	403122	440785	565646	441740	494955	324765	267089	215746	202589	248891	339406	378939	233394	358528
Sedoheptulosephosphate	C7 H15 O10 P	290.04	14.254	665726	741429	403946	667839	772636	413771	1.76135e+06	1.50438e+06	1.43206e+06	1.47655e+06	1.33244e+06	702331	164217	680600	601771	748750	921938	562419	408301	1.05906e+06	1054332	1.2967e+06	1.32998e+06	1.26755e+06	1.8344e+06	1.42146e+06	1.96488e+06
Argininosuccinicacid	C10 H18 N4 O6	290.122	15.578	136929	95551.6	69260.1	110742	108476	90054.8	124332	121674	92667.6	87642	114918	75157.2	67569.3	80245.9	128988	105645	107487	138352	98009.8	99683.6	65432.3	88483.2	84662.2	93687.9	114791	98442.5	171056
N-Acetylaspartylglutamicacid	C11 H16 N2 O8	304.09	8.117	3.53509e+07	1.27584e+06	2.96702e+07	4.10383e+07	2.88914e+07	3.02971e+07	1.95442e+07	3.52301e+07	1.26435e+06	349193	3.31197e+07	3.36243e+07	2.87971e+07	3.03183e+07	2.09093e+07	3.68442e+07	3.2052e+07	2.63301e+07	1.15793e+06	1.15176e+06	7.76659e+06	2.72651e+07	2.87364e+07	2.21352e+07	1.66043e+07	2.72504e+07	1.68872e+07
N-Acetylneuraminate	C11 H19 N O9	309.105	11.58	2.17263e+06	1.15337e+06	1.59271e+06	2.56264e+06	1.24255e+06	1.2752e+06	1.66661e+06	2.22141e+06	1.58701e+06	1.15534e+06	1.63683e+06	1.85811e+06	2.17496e+06	2.01962e+06	1.89846e+06	2.42128e+06	1.69742e+06	1.40395e+06	1.03368e+06	1.88793e+06	1.48206e+06	1.48463e+06	1.36393e+06	1.29523e+06	1.45377e+06	2.12546e+06	1.27658e+06
Decanoylcarnitine	C17 H33 N O4	315.24	6.353	490962	197835	264952	1.07074e+06	397614	371405	704300	645548	544956	383046	1.15053e+06	1.22035e+06	1.20934e+06	441091	554307	1.20006e+06	433553	732806	699652	981720	599925	642467	728228	737853	662637	648974	610883
Cytidinemonophosphate	C9 H14 N3 O8 P	323.051	15.151	801170	463085	373029	696280	818978	455453	719241	764189	639856	565647	499895	440855	498058	677958	565895	935153	641230	498012	206950	590455	553094	693099	705888	701564	537296	860819	490007
Uridinemonophosphate	C9 H13 N2 O9 P	324.035	12.922	1.20171e+06	315602	303060	538143	868096	358297	655715	787020	551021	376079	549799	393926	440372	588248	598266	746304	634979	392174	163760	393422	352155	528504	534536	596750	462294	725556	352144
cAMP	C10 H12 N5 O6 P	329.052	9.956	295921	193888	293340	350089	207564	245340	334531	363531	281085	167136	259771	261940	736501	347951	332363	573006	308630	401330	363767	340556	301661	309897	303088	325428	278490	356543	263355
Lauroylcarnitine	C19 H37 N O4	343.271	6.154	5.07318e+06	1.89606e+06	2.25342e+06	1.03652e+07	4.26908e+06	3.97293e+06	3.9689e+06	3.0385e+06	3.16965e+06	2.93277e+06	6.17876e+06	5.88015e+06	6.86786e+06	3.5999e+06	5.0963e+06	7.11129e+06	4.47778e+06	4.02661e+06	2.81861e+06	4.07655e+06	3.5758e+06	4.42824e+06	4.02753e+06	4.00315e+06	2.83475e+06	4.50065e+06	3.52448e+06
Adenosinemonophosphate	C10 H14 N5 O7 P	347.062	12.785	1.22464e+07	5.08691e+06	5.87524e+06	9.30171e+06	7.98026e+06	5.44168e+06	6.63145e+06	9.36868e+06	6.21472e+06	4.10178e+06	5.28641e+06	3.53811e+06	7.68459e+06	7.8059e+06	9.58823e+06	1.09751e+07	8.49062e+06	5.91901e+06	2.44949e+06	6.30008e+06	5.24258e+06	6.59351e+06	6.16478e+06	5.63099e+06	4.89344e+06	1.08782e+07	3.98941e+06
Inosinemonophosphate	C10 H13 N4 O8 P	348.046	13.364	6.96563e+06	2.22188e+06	1.39366e+06	2.6785e+06	7.10705e+06	2.10394e+06	2.99839e+06	4.61175e+06	3.56098e+06	1.90541e+06	2.09416e+06	1.38138e+06	2.89975e+06	3.47127e+06	5.55649e+06	4.38958e+06	5.12284e+06	2.56243e+06	227903	1.54794e+06	1.67496e+06	2.07357e+06	2.54138e+06	2.60879e+06	3.20314e+06	5.41996e+06	2.49646e+06
PLK	C17 H32 N4 O4	356.241	16.907	256986	196236	333896	508082	176665	249920	265497	384022	173106	151327	295239	291941	586930	240152	196186	221555	205177	228503	202997	205420	258714	188660	228238	337277	193725	187591	168490
Guanosinmonophosphate	C10 H14 N5 O8 P	363.057	14.498	9.16095e+06	1.08322e+07	5.72508e+06	9.22925e+06	1.09127e+07	9.92797e+06	1.25736e+07	1.28686e+07	1.42174e+07	1.25174e+07	1.07326e+07	9.58935e+06	6.80159e+06	9.88037e+06	1.18436e+07	1.23313e+07	1.34772e+07	1.31775e+07	9.26875e+06	1.36491e+07	1.1133e+07	1.25827e+07	1.38241e+07	1.08471e+07	1.18073e+07	1.72624e+07	1.33743e+07
Riboflavin	C17 H20 N4 O6	376.137	5.319	1.85372e+06	1.75926e+06	2.32363e+06	3.07217e+06	1.22339e+06	1.932e+06	1.74654e+06	2.35719e+06	1.93847e+06	1.57001e+06	1.54811e+06	1.95313e+06	3.99545e+06	2.71356e+06	2.66998e+06	2.50597e+06	2.18017e+06	3.23284e+06	2.5572e+06	1.62248e+06	2.31772e+06	1.20441e+06	2.05221e+06	1.97789e+06	1.87328e+06	1.66505e+06	1.93025e+06
S-Adenosylhomocysteine	C14 H20 N6 O5 S	384.121	11.615	198574	222492	191525	340490	177339	190441	215213	247715	225337	211553	177768	200994	292049	229458	235377	309392	243696	306527	246698	295610	261998	220261	237152	247486	296204	264454	234675
S-Adenosylmethionine	C15 H22 N6 O5 S	398.136	17.027	124837	209232	128392	169344	129994	152364	297876	213740	196693	308800	180574	259010	198585	162428	181895	220943	120011	168496	307945	242263	201214	232434	239088	239098	117830	147304	210492
Palmitoylcarnitine	C23 H45 N O4	399.334	5.842	3.86859e+07	1.964e+07	2.93983e+07	6.8371e+07	3.59748e+07	2.37688e+07	3.87714e+07	3.54937e+07	2.33933e+07	1.99663e+07	4.12671e+07	4.26747e+07	5.33166e+07	3.28433e+07	3.87601e+07	4.99365e+07	34312924	3.9053e+07	2.98711e+07	4.14281e+07	2.97717e+07	3.14948e+07	3.96566e+07	4.0765e+07	2.26335e+07	3.61908e+07	4.16682e+07
Cytidinediphosphocholine	C14 H26 N4 O11 P2	488.106	17.087	233299	215844	316359	445180	237322	174220	461780	398531	286236	237923	199876	231151	275794	377636	213120	506143	275817	118047	30937.7	308942	373096	447735	306872	344679	119515	383950	157229
Adenosinediphosphoribose	C15 H23 N5 O14 P2	559.071	14.434	31748.8	36993.5	25980	33189.1	27654.7	29753.6	36453.7	33519.3	36811	32565.5	32453.9	27448.3	49243.4	59136.7	41024.8	67354.4	31326.7	33152.1	32270.3	50216.6	33130.6	32944.7	42789.3	39723.4	27377.9	34527.3	31569.3
Uridinediphosphoglucose	C15 H24 N2 O17 P2	566.055	14.688	488799	781694	288657	589596	622005	824610	846952	811254	894306	924821	700059	621910	493431	698740	937602	875629	1.02989e+06	1.3406e+06	1.08462e+06	1.28598e+06	790265	959668	1.12277e+06	722083	709560	1.20193e+06	905461
Uridinediphospho-N-acetylglucosamine	C17 H27 N3 O17 P2	607.081	14.102	3.00361e+06	2.82743e+06	1.87753e+06	3.0835e+06	3.00122e+06	2.87467e+06	3.01453e+06	3.74909e+06	3.32435e+06	2.80693e+06	2.84262e+06	3.09759e+06	3.23297e+06	3.0095e+06	3.48131e+06	3.80102e+06	3.59977e+06	3.98368e+06	2.53742e+06	3.87676e+06	2.79353e+06	2.63339e+06	2.89528e+06	3.19921e+06	2.96381e+06	3.48446e+06	2.71719e+06
NAD	C21 H27 N7 O14 P2	663.108	13.848	49583.7	34053.4	21872.8	34368.4	70833.9	23152.3	42149	48813.1	50490.8	23931.2	26423.4	20397.8	87447.2	38756.2	79494.6	83624.1	80152.5	79370.9	38304	40122.3	25267.6	33221.9	39663.7	31091.5	36477.5	62186.6	57024.1
Phosphatidylcholine (34:3)	C42 H80 N O8 P	757.56	8.409	9.97546e+06	5.75952e+06	7.03034e+06	7.76583e+06	6.23102e+06	8.48091e+06	6.64205e+06	7.06388e+06	1.25603e+07	8.97908e+06	8.72042e+06	1.20859e+07	1.10602e+07	8.73149e+06	1.12647e+07	1.05401e+07	5.79142e+06	1.04266e+07	1.20483e+07	1.31894e+07	8.7933e+06	9.73461e+06	1.0718e+07	6.58928e+06	9.56408e+06	1.36066e+07	1.06229e+07
